# Supplementary material
Source: Springer Nature journal article supplement (https://www.springermedizin.de/resource/supplementary/12933_2010_274_MOESM2_ESM.pdf/9539992)

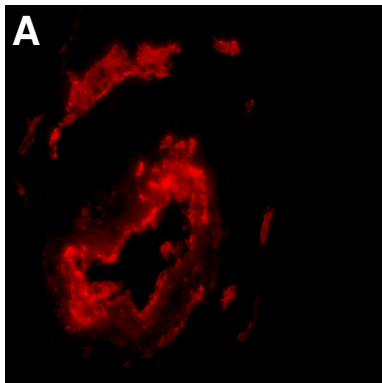

**TRITC**  
( $\alpha$ -SMA)

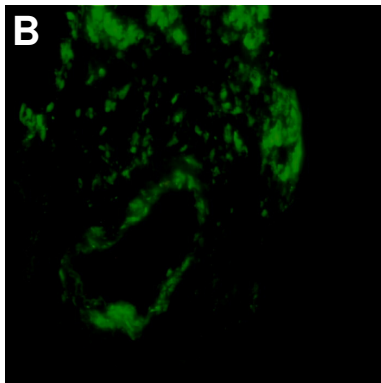

**GFP**  
(bone marrow derived)

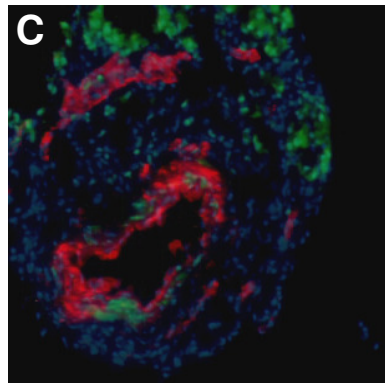

**Merge**  
(top panel including DAPI)

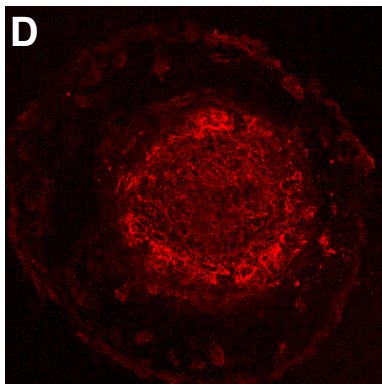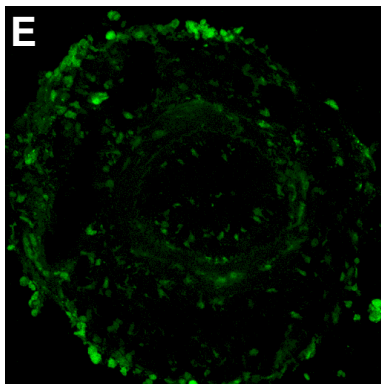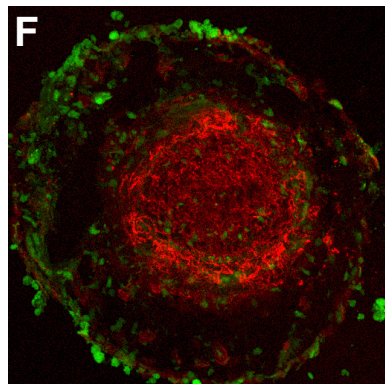

Supplement: MOESM2 [file 9539992]
